# Supplementary material
Source: HighWire-hosted journal article supplement (http://www.qdcxjkg.com/highwire/filestream/113687/field_highwire_adjunct_files/0/Supplementary_material.pdf)

**Supplemental table 1** The numbers and timing of MPE samples

| MPEs sampling timing | Patients number | MPEs sample number |
|----------------------|-----------------|--------------------|
| Pre-chemotherapy     | 306             | 381                |
| Post-chemotherapy    | 206             | 332                |
| Pre-EGFR TKI         | 317             | 390                |
| Post-EGFR TKI        | 206             | 323                |

**Supplemental Table 2 Clinical characteristics of stage IV lung adenocarcinoma patients with wild-type *EGFR***

|                                      | All patients | EGFR TKI use | No EGFR TKI | <i>P</i> |
|--------------------------------------|--------------|--------------|-------------|----------|
| <b>Total</b>                         | 152          | 109          | 43          |          |
| <b>Age, median, years</b>            | 65.4         | 65.6         | 65.2        | 0.993    |
| <b>(range)</b>                       | (27.9–91.1)  | (27.9–89.3)  | (29.5–91.1) |          |
| <b>Sex</b>                           |              |              |             | 0.058    |
| <b>Female</b>                        | 68           | 54 (49.5%)   | 14 (32.6%)  |          |
| <b>Male</b>                          | 84           | 55 (50.5%)   | 29 (67.4%)  |          |
| <b>Smoking status</b>                |              |              |             | 0.008    |
| <b>Never-smokers</b>                 | 96           | 76 (69.7%)   | 20 (46.5%)  |          |
| <b>Smokers</b>                       | 56           | 33 (30.3%)   | 23 (53.5%)  |          |
| <b>ECOG PS</b>                       |              |              |             | 0.816    |
| <b>0-1</b>                           | 122          | 88 (80.7%)   | 34 (79.1%)  |          |
| <b>2-4</b>                           | 30           | 21 (19.3%)   | 9 (20.9%)   |          |
| <b>Stage IV</b>                      |              |              |             | 0.291    |
| <b>M1a</b>                           | 64           | 43 (39.4%)   | 21 (48.8%)  |          |
| <b>M1b</b>                           | 88           | 66 (60.6%)   | 22 (51.2%)  |          |
| <b>MPE</b>                           |              |              |             | 0.616    |
| <b>At initial diagnosis</b>          | 116          | 27 (24.8%)   | 9 (20.9%)   |          |
| <b>Following disease progression</b> | 36           | 82 (75.2%)   | 34 (79.1%)  |          |
| <b>Distant metastasis</b>            |              |              |             |          |
| <b>Lung</b>                          | 76           | 55 (50.5%)   | 21 (48.8%)  | 0.857    |
| <b>Pleural seeding</b>               | 48           | 33 (30.3%)   | 15 (34.9%)  | 0.582    |
| <b>Pericardial effusion</b>          | 24           | 5 (4.6%)     | 2 (4.7%)    | 1.000*   |
| <b>Bone</b>                          | 55           | 41 (37.6%)   | 14 (32.6%)  | 0.559    |
| <b>Brain</b>                         | 24           | 13 (11.9%)   | 11 (25.6%)  | 0.038    |
| <b>Liver</b>                         | 27           | 20 (18.3%)   | 7 (16.3%)   | 0.764    |
| <b>Adrenal gland</b>                 | 16           | 7 (6.4%)     | 9 (20.9%)   | 0.009    |
| <b>Other</b>                         | 13           | 10 (9.2%)    | 3 (7.0%)    | 0.663    |

MPE, malignant pleural effusion; ECOG PS, Eastern Cooperative Oncology Group performance status.

\* by Fisher's Exact test

**Supplemental Table 3—Cytotoxic therapies between serial MPE sampling**

| EGFR mutations      |                                             |                    | Wild type           |                                                        |                    |
|---------------------|---------------------------------------------|--------------------|---------------------|--------------------------------------------------------|--------------------|
| No. of Chemotherapy | Chemotherapy                                | Number of Patients | No. of Chemotherapy | Chemotherapy                                           | Number of Patients |
| 1                   | Gemcitabine                                 | 6                  | 1                   | Gemcitabine                                            | 2                  |
| 1                   | Gemcitabine+Cisplatin                       | 5                  | 1                   | Gemcitabine+Cisplatin                                  | 4                  |
| 1                   | Gemcitabine+Cisplatin+Bevacizumab           | 1                  | 1                   | Gemcitabine+Cisplatin+Bevacizumab                      | 1                  |
| 1                   | Gemcitabine+Carboplatin+Bevacizumab         | 1                  | 1                   | Pemetrexed                                             | 5                  |
| 1                   | Pemetrexed                                  | 4                  | 1                   | Docetaxol                                              | 3                  |
| 1                   | Pemetrexed+Cisplatin                        | 1                  | 1                   | Docetaxol+Cisplatin                                    | 1                  |
| 1                   | Docetaxol                                   | 1                  | 1                   | Vinorelbine                                            | 5                  |
| 1                   | Docetaxol+Cisplatin                         | 4                  | 1                   | Cetuximab                                              | 1                  |
| 1                   | Vinorelbine                                 | 2                  | 2                   | Pemetrexed→Vinorelbine                                 | 2                  |
| 1                   | Irinotecan                                  | 2                  | 2                   | Pemetrexed→Paclitaxol                                  | 1                  |
| 1                   | Epirubicin                                  | 1                  | 2                   | Gemcitabine+Cisplatin→Taxotere+Bevacizumab             | 1                  |
| 2                   | Pemetrexed→Gemcitabine                      | 1                  | 2                   | Paclitaxol→Pemetrexed                                  | 1                  |
| 2                   | Pemetrexed→Vinorelbine+Carboplatin+Eribitux | 1                  | 2                   | Taxotere+Pemetrexed                                    | 1                  |
| 2                   | Gemcitabine+Cisplatin→Pemetrexed            | 2                  | 2                   | Taxotere→Epirubicin                                    | 1                  |
| 2                   | Gemcitabine+Cisplatin→Docetaxol             | 2                  | 3                   | Pemetrexed→ Gemcitabine→Irinotecan+Bevacizumab         | 1                  |
| 2                   | Gemcitabine→ Paclitaxol                     | 1                  | 3                   | Gemcitabine+cisplatin→Taxotere+Cisplatin               | 1                  |
| 2                   | Gemcitabine→Docetaxol                       | 1                  | 3                   | Taxotere+Cisplatin→Gemcitabine+Cisplatin→Pemetrexed    | 1                  |
| 2                   | Vinorelbine→Pemetrexed+Bevacizumab          | 1                  | 3                   | Taxotere→Pemetrexed→Vinorelbine                        | 1                  |
| 2                   | Paclitaxol→Pemetrexed+Bevacizumab           | 1                  | 4                   | Gemcitabine+Cisplatin→Docetaxol→Pemetrexed→Vinorelbine | 1                  |
| 2                   | Docetaxol+Carboplatin→Pemetrexed            | 1                  | 4                   | Taxotere→Vinorelbine→Paclitaxol→Taxotere               | 1                  |
| 2                   | Docetaxol→Pemetrexed                        | 1                  |                     |                                                        |                    |
| 3                   | Pemetrexed→Docetaxol→Bevacizumab+Etoposie   | 1                  |                     |                                                        |                    |
| 3                   | Gemcitabine+Cisplatin→Docetaxol→Pemetrexed  | 1                  |                     |                                                        |                    |
| 3                   | Gemcitabine→Vinorelbine→Pemetrexed          | 1                  |                     |                                                        |                    |

|   |                                                                     |   |  |  |
|---|---------------------------------------------------------------------|---|--|--|
| 3 | Docetaxol+Cisplatin+Bevacizumab→Pemetrexed+Erbitax→Gemcitabine      | 1 |  |  |
| 4 | Gemcitabine+Cisplatin→Docetaxol→Pemetrexed→Vinorelbine              | 1 |  |  |
| 4 | Paclitaxol+Carboplatin→Gemcitabine+Cisplatin→Vinorelbine→Pemetrexed | 1 |  |  |

**Supplemental table 4 Clinical characteristics of the patients with or without secondary T790M development after acquired resistance to EGFR TKIs**

|                                              | Patient No.         | Secondary T790M     |                     | <i>p</i>           |
|----------------------------------------------|---------------------|---------------------|---------------------|--------------------|
|                                              |                     | Presence            | Absence             |                    |
| <b>Total No.</b>                             | 99                  | 48                  | 51                  |                    |
| <b>Age, mean years<br/>(range)</b>           | 66.1<br>(29.5–91.6) | 67.5<br>(29.5–91.6) | 63.6<br>(34.6–89.6) | 0.354 <sup>§</sup> |
| <b>Sex</b>                                   |                     |                     |                     | 0.825              |
| <b>Female</b>                                | 67                  | 33                  | 34                  |                    |
| <b>Male</b>                                  | 32                  | 15                  | 17                  |                    |
| <b>Smoking</b>                               |                     |                     |                     | 0.259              |
| <b>Nonsmokers</b>                            | 80                  | 41                  | 39                  |                    |
| <b>Smokers</b>                               | 19                  | 7                   | 12                  |                    |
| <b>ECOG PS</b>                               |                     |                     |                     | 0.879              |
| <b>0–1</b>                                   | 79                  | 38                  | 41                  |                    |
| <b>2–4</b>                                   | 205                 | 10                  | 10                  |                    |
| <b>Stage IV</b>                              |                     |                     |                     | 0.970              |
| <b>M1a</b>                                   | 39                  | 19                  | 20                  |                    |
| <b>M1b</b>                                   | 60                  | 29                  | 31                  |                    |
| <b>MPE</b>                                   |                     |                     |                     | 0.216              |
| <b>At initial diagnosis</b>                  | 75                  | 39                  | 36                  |                    |
| <b>Following disease<br/>    progression</b> | 24                  | 9                   | 15                  |                    |
| <b>EGFR TKI</b>                              |                     |                     |                     | 0.118              |
| <b>Gefitinib</b>                             | 78                  | 41                  | 37                  |                    |
| <b>Erlotinib</b>                             | 21                  | 7                   | 14                  |                    |
| <b>Prior chemotherapy</b>                    |                     |                     |                     | 0.515              |
| <b>Yes</b>                                   | 32                  | 14                  | 18                  |                    |
| <b>No</b>                                    | 67                  | 34                  | 33                  |                    |

MPE, malignant pleural effusion; ECOG PS, Eastern Cooperative Oncology Group performance status.

**Supplemental Figure 1** The distribution of the 1400 pleural effusions.

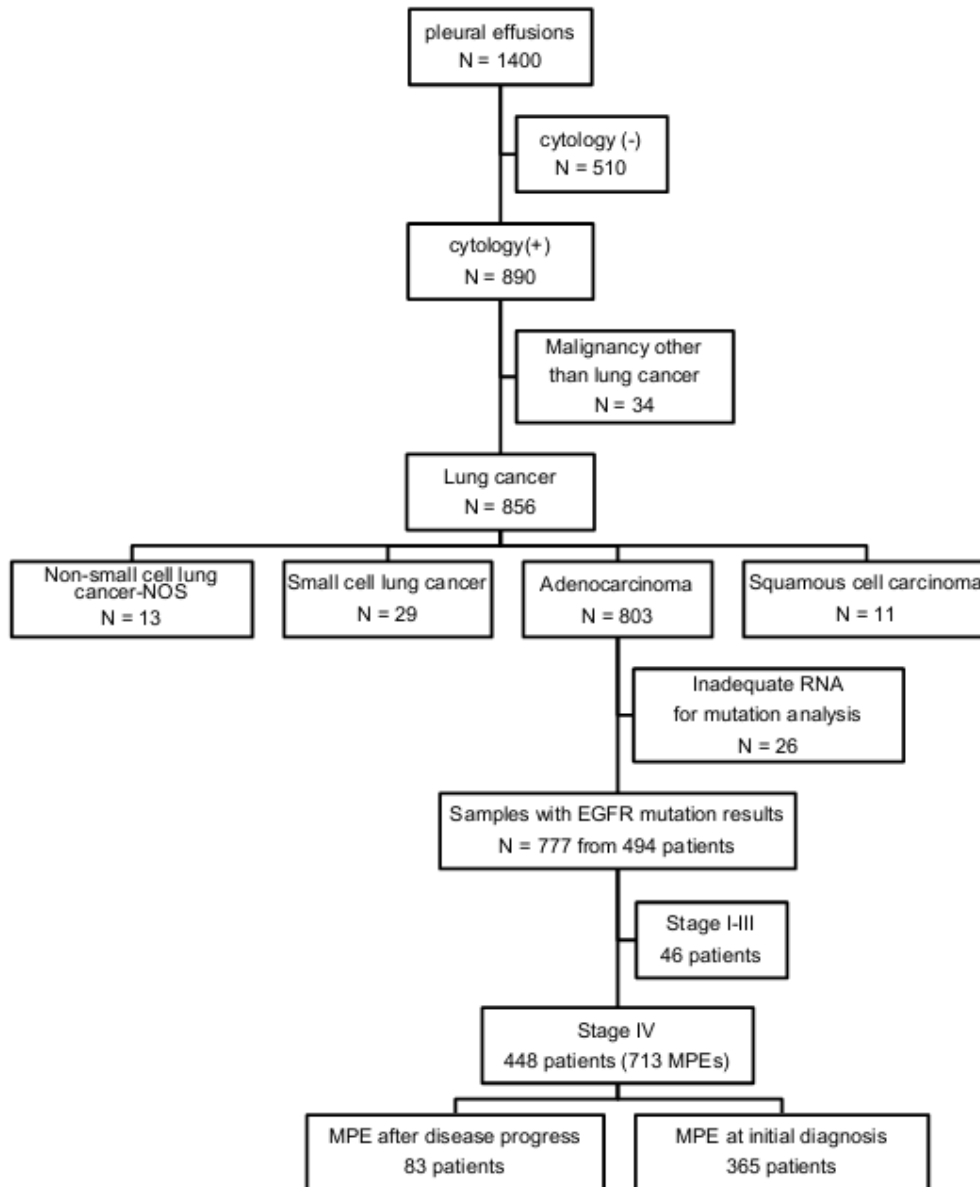

Supplement: Supplementary_material.pdf [file Supplementary_material.pdf]
